# Supplementary material
Source: ML conference proceedings conference paper supplement (https://openreview.net/forum?id=BAeO6LIjcec)

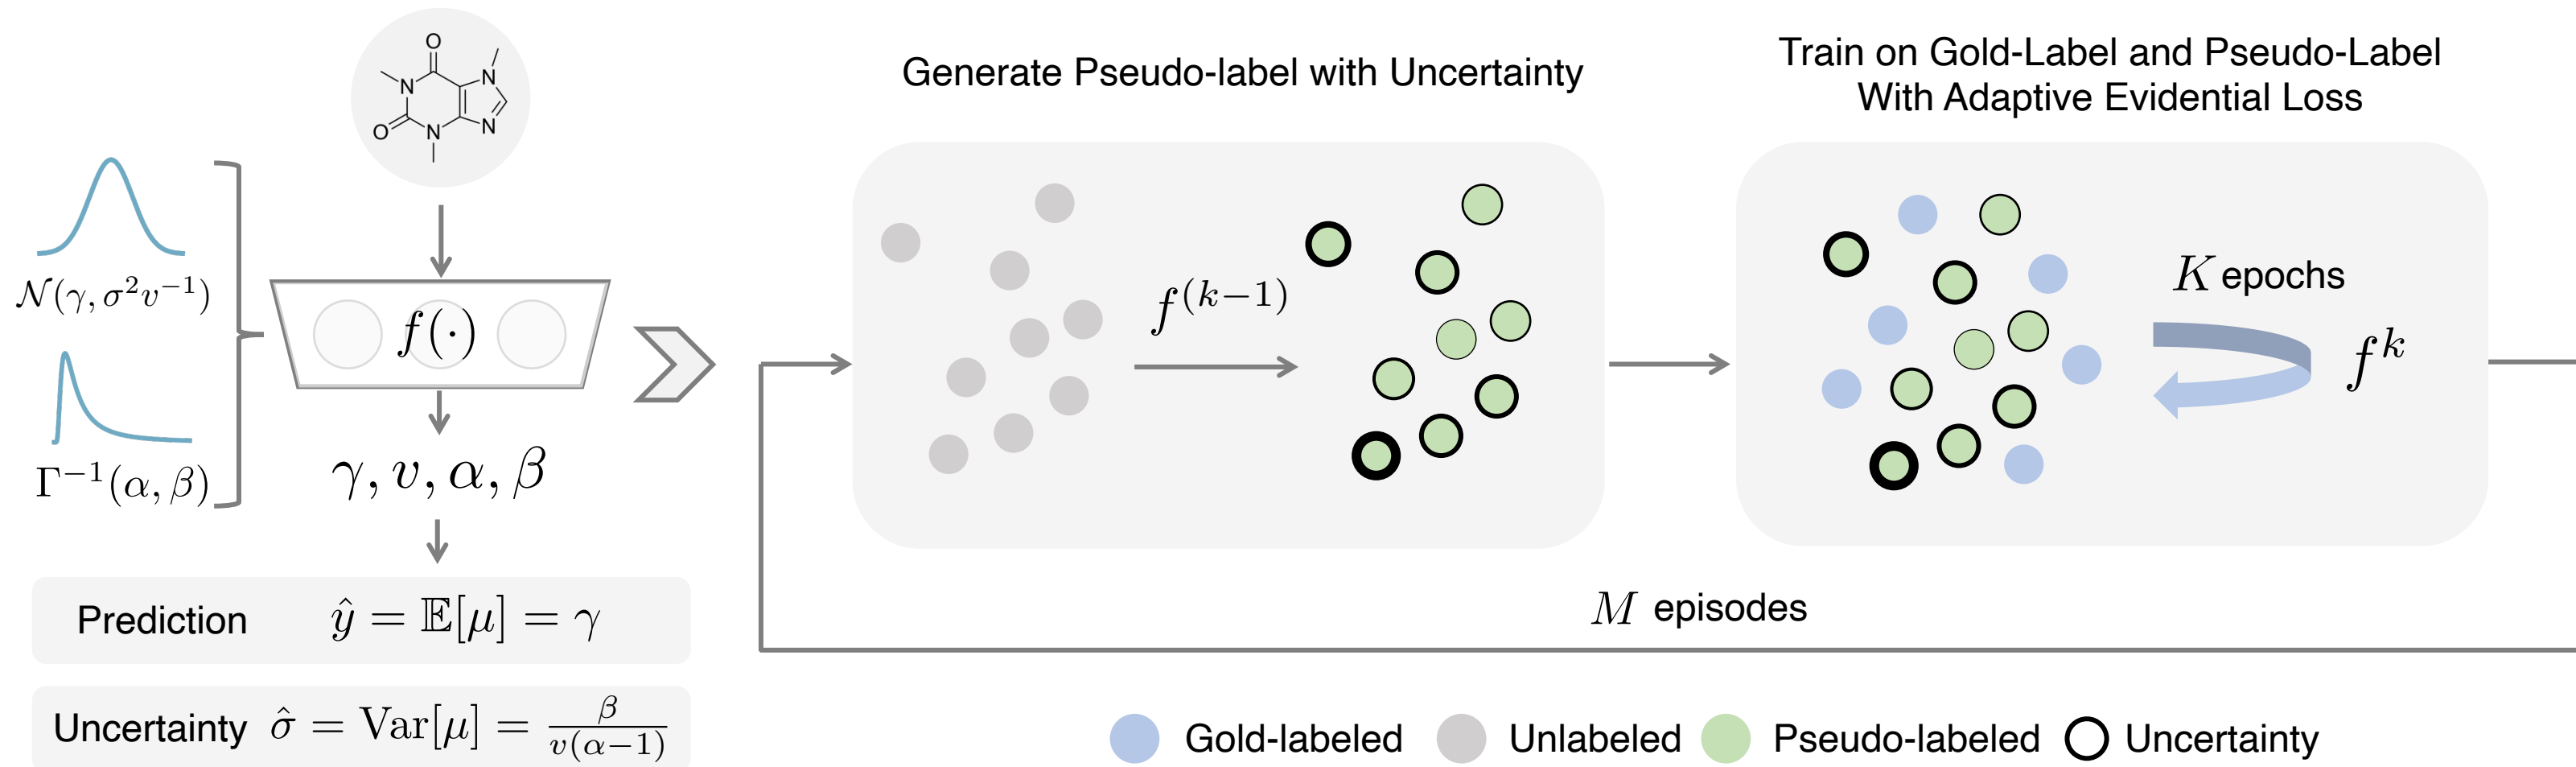

Supplement: supplementary_material [file attachment]

Increasing Error

$$\rho = 0.418$$

Increasing Log-Epistemic Uncertainty

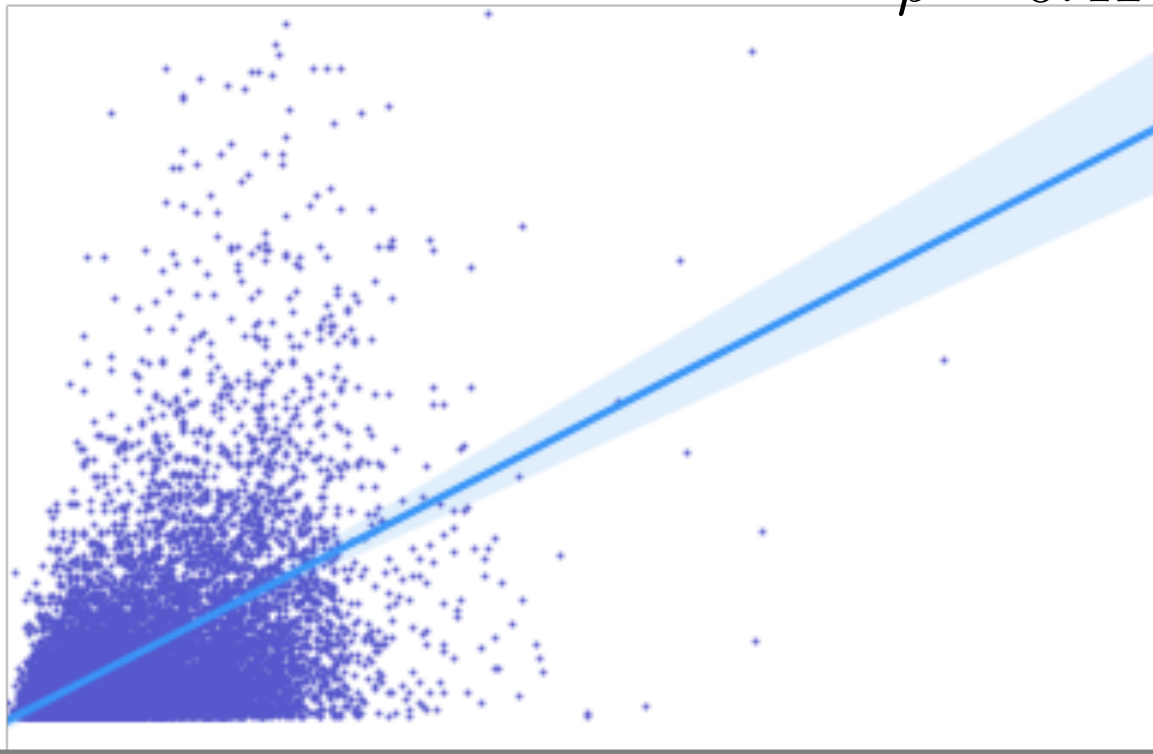

Supplement: supplementary_material [file attachment]

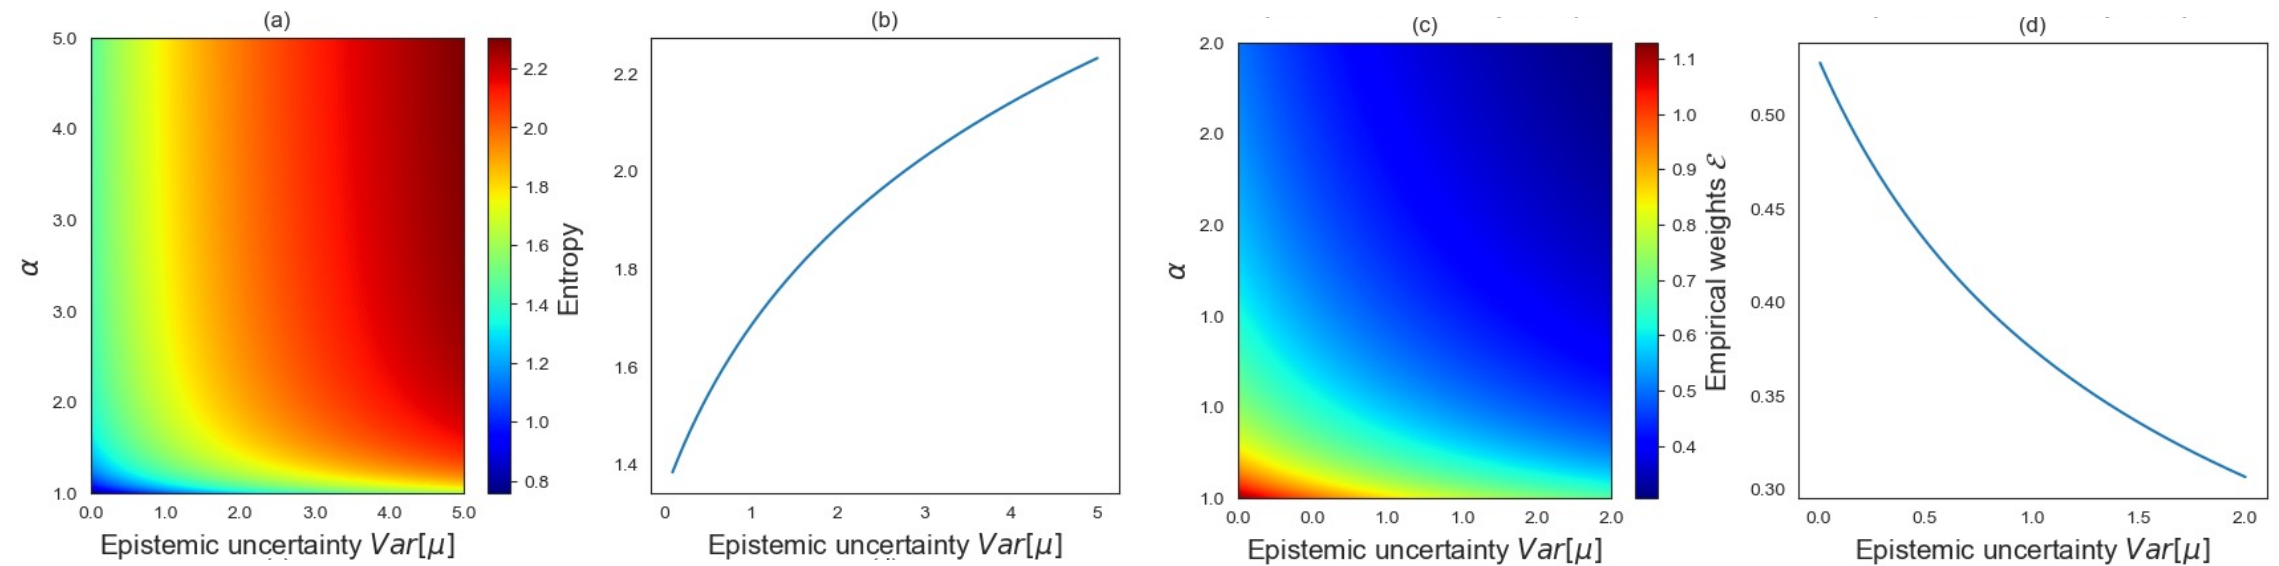

Supplement: supplementary_material [file attachment]
